# Supplementary material for: Understanding the fundamental electrical and photoelectrochemical behavior of a hematite photoanode
Source: Royal Society of Chemistry journal article supplement (doi:10.1039/c6cp03680e), 2016-01-01
Supplement: c6cp03680e1.pdf [file c6cp03680e1.pdf]

## Electronic Supporting Information

### Understanding fundamental electrical and photoelectrochemical behavior of hematite photoanode

Mario R. S. Soares,<sup>a</sup> Ricardo H. Gonçalves,<sup>a</sup> Içamira C. Nogueira,<sup>b</sup> Jefferson Bettini,<sup>c</sup> Adenilson J. Chiquito<sup>d</sup> and Edson R. Leite<sup>a</sup>

<sup>a.</sup> Chemistry Department, Federal University of São Carlos, São Carlos, SP, Brazil.

<sup>b.</sup> Postgraduate Program in Materials Engineering, Federal Institute of Maranhão – IFMA, São Luís, MA, Brazil.

<sup>c.</sup> Laboratório Nacional de Nanotecnologia LNNano, Caixa Postal 6192, BR-13083970, Campinas, SP, Brazil.

<sup>d.</sup> Physics Department, Federal University of São Carlos, São Carlos, SP, Brazil.

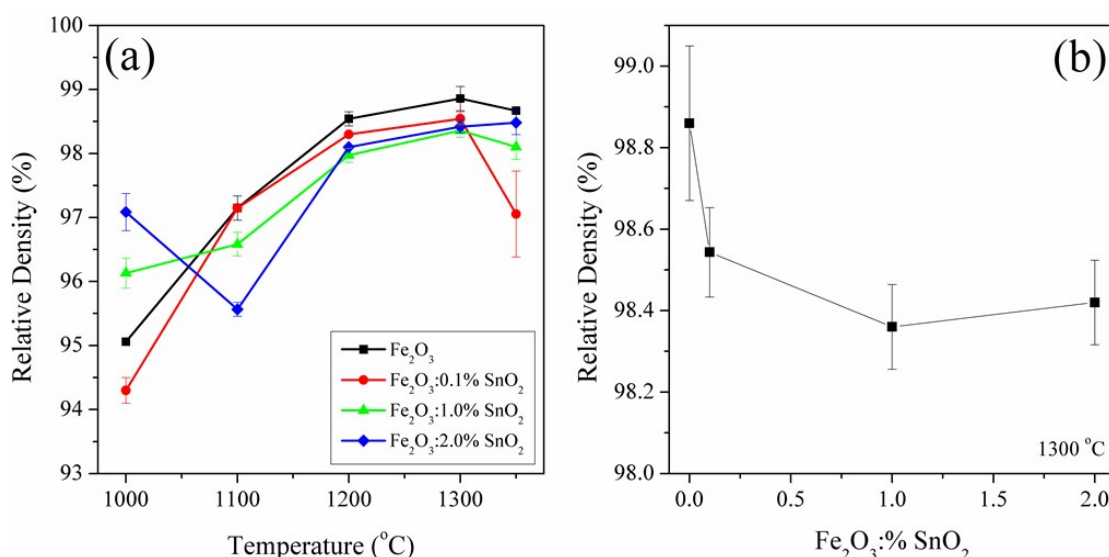

**Fig. S1.** Optimization of the sintering process: a) relative density as function of the temperature (sintering time of 6 h.) for the hematite, considering different  $\text{SnO}_2$  concentration; b) relative density as function of the concentration of  $\text{SnO}_2$  (sintering temperature of 1300 °C, sintering time 6h).

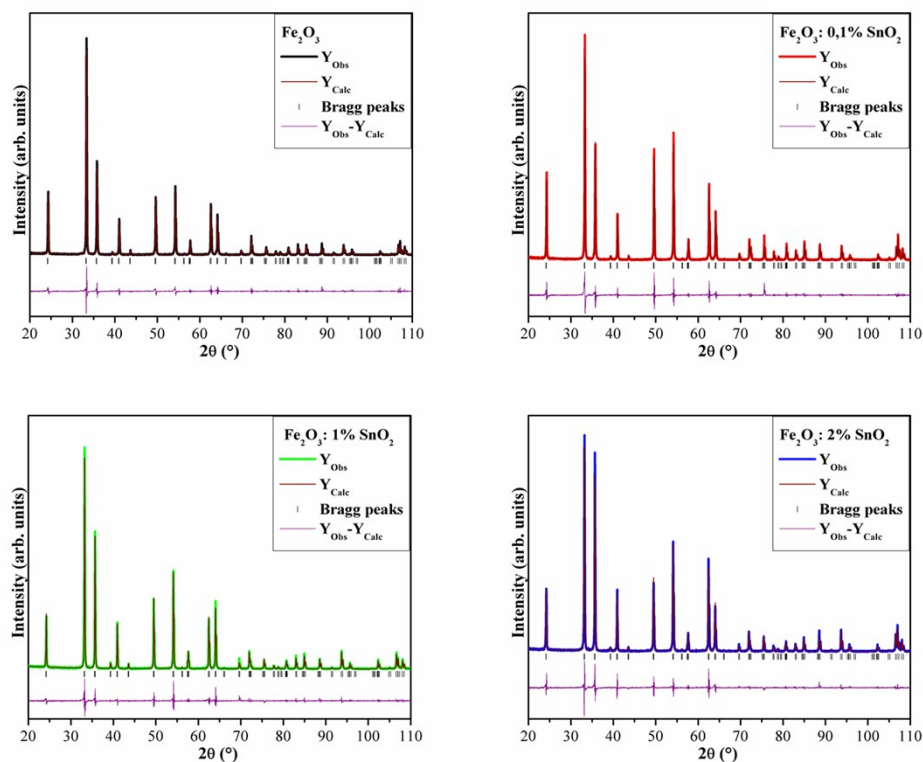

**Fig. S2.** Rietveld refinements of the hematite doped with different SnO<sub>2</sub> concentration.

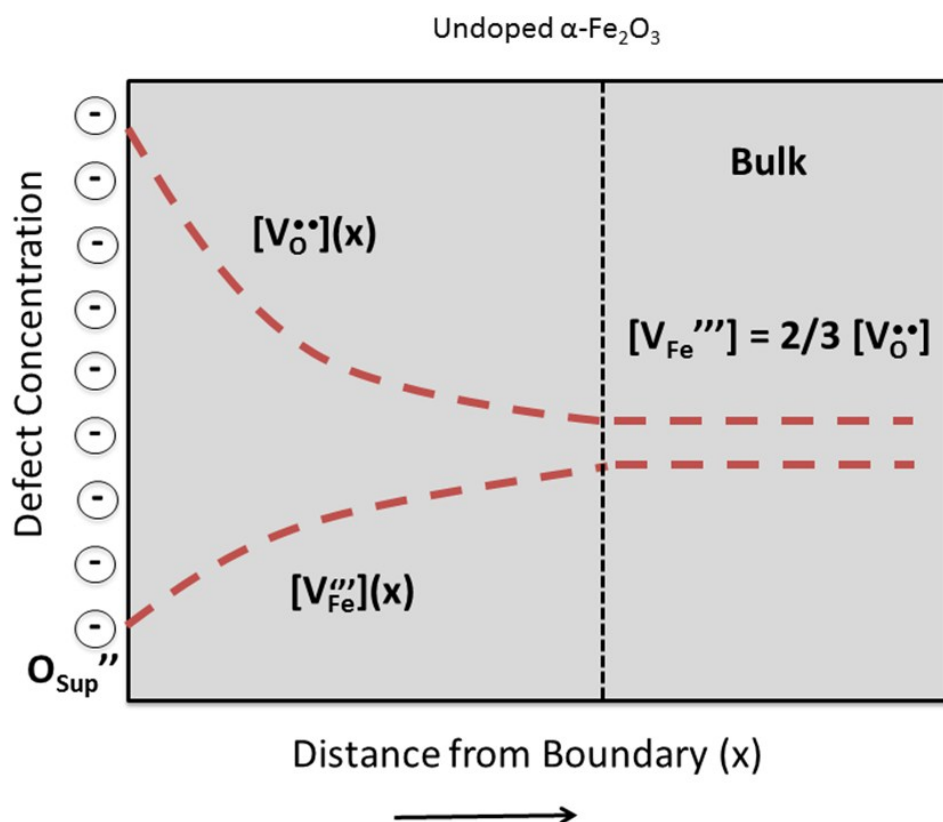

**Fig. S3.** Schematic representation of the boundary space charge and the concentration of associated charged defects in the undoped hematite.

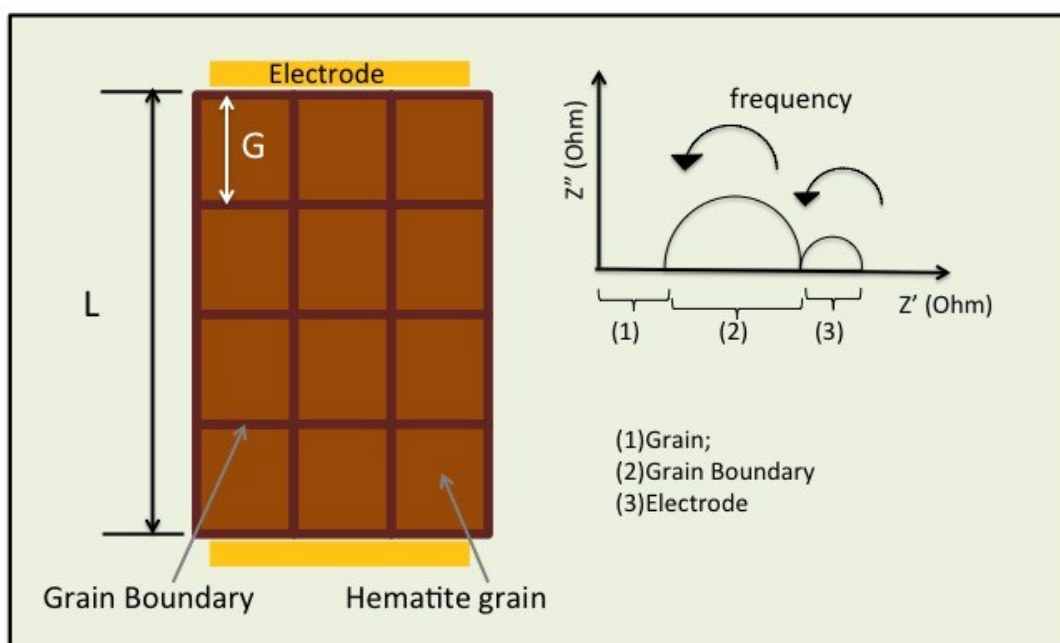

**Fig. S4.** Schematic representation of the brick-layer model used for the SSIS analysis.

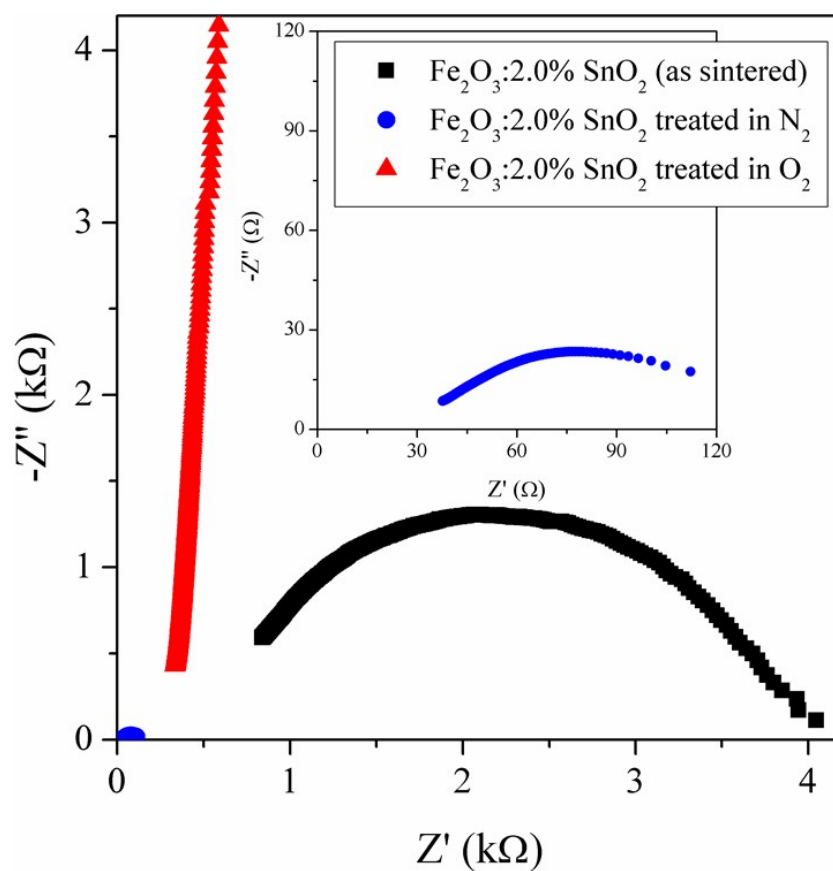

**Fig. S5.** SSIS analysis (Nyquist plot) of the samples doped with 2% wt. of  $\text{SnO}_2$  and treated at different atmospheres. The inset shows in detail the sample treated in  $\text{N}_2$  flow.

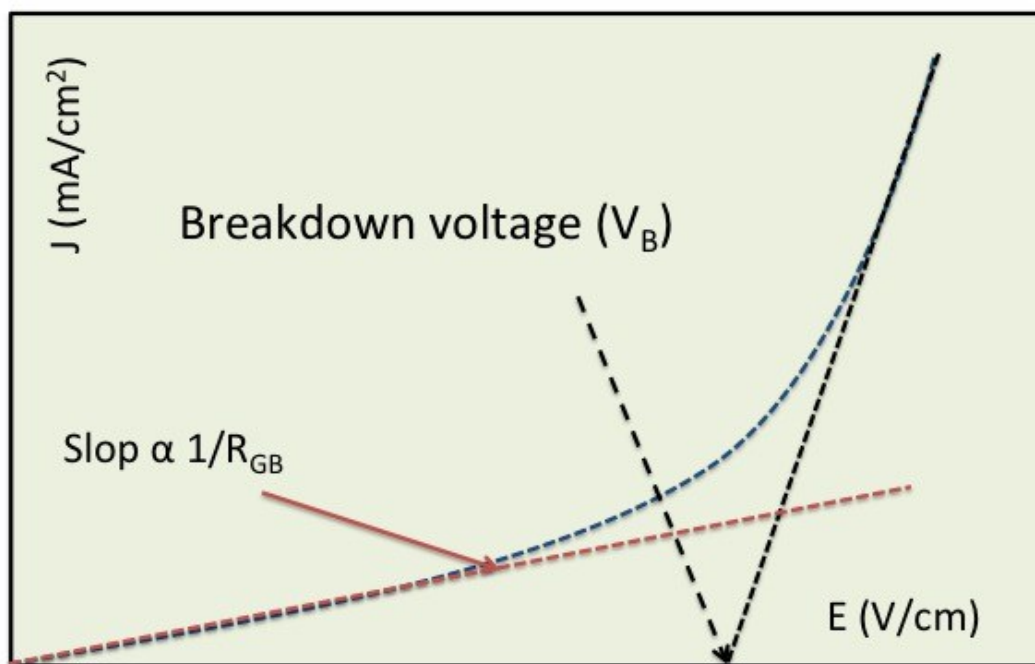

Fig. S6. Analysis of the J vs. E plot.

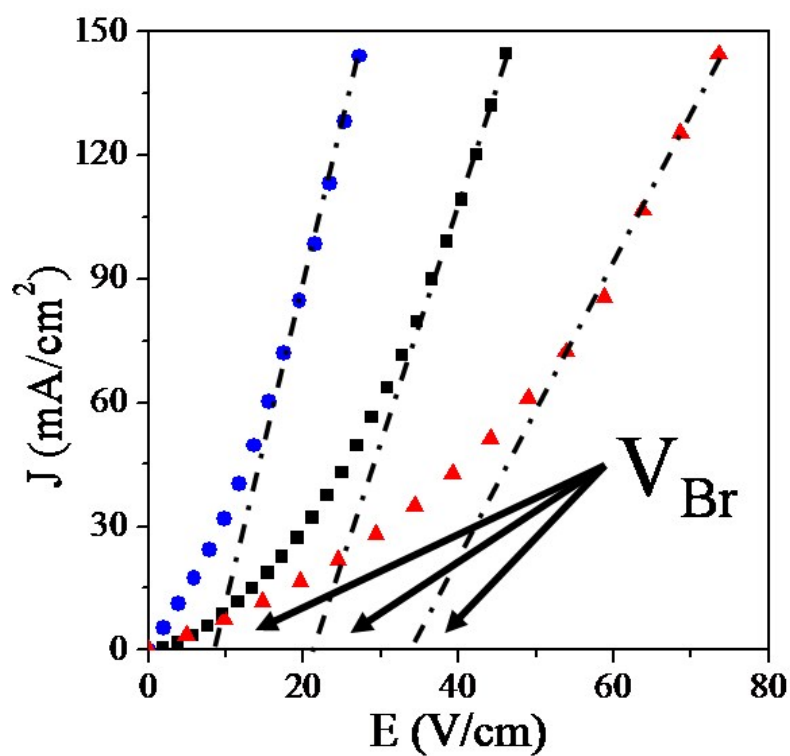

Fig. S7. Breakdown voltage ( $V_{Br}$ ) presented at J vs. E plot for the doped samples with 2% wt. of  $\text{SnO}_2$  and treated at different atmospheres: black square represents sample as sintered; blue circle represents treatment in  $\text{N}_2$  flow and red triangle represents treatment in  $\text{O}_2$  flow.
